# Supplementary material for: Mesenchymal Stem Cells Enhance Allogeneic Islet Engraftment in Nonhuman Primates
Source: PubMed Central journal article supplement — Diabetes. 2010 Jul 9;59(10):2558–68. doi: 10.2337/db10-0136 (PMC3279532; doi:10.2337/db10-0136), 2010-07-09
Supplement: supp_db10-0136_db100136ONLINEAPPENDIX.pdf [file supp_db10-0136_db100136ONLINEAPPENDIX.pdf]

ONLINE APPENDIX

Figure S1

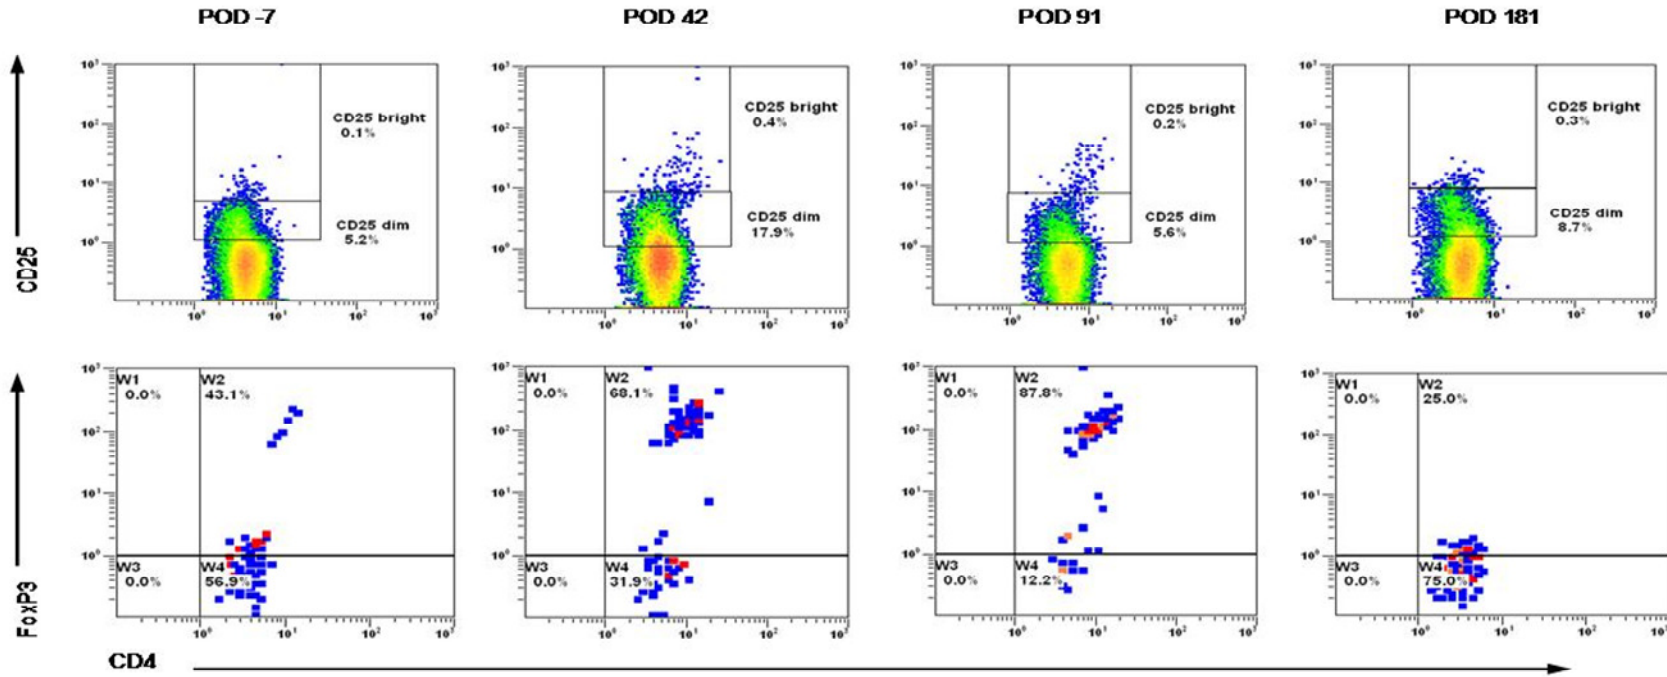

Frequency of FoxP3 positive T cells in peripheral blood of animal 35-493 gated for CD3<sup>+</sup>CD4<sup>+</sup>CD25<sup>bright</sup> lymphocytes. The animal experienced loss of graft function on POD 106.
